# Supplementary material for: Novel, heterozygous, de novo pathogenic variant (c.4963delA: p.Thr1656Glnfs*42) of the NF1 gene in a Chinese family with neurofibromatosis type 1
Source: PubMed Central journal article supplement (PMC10123994; doi:10.1186/s12920-023-01514-x), 2023-04-24

Figure 4

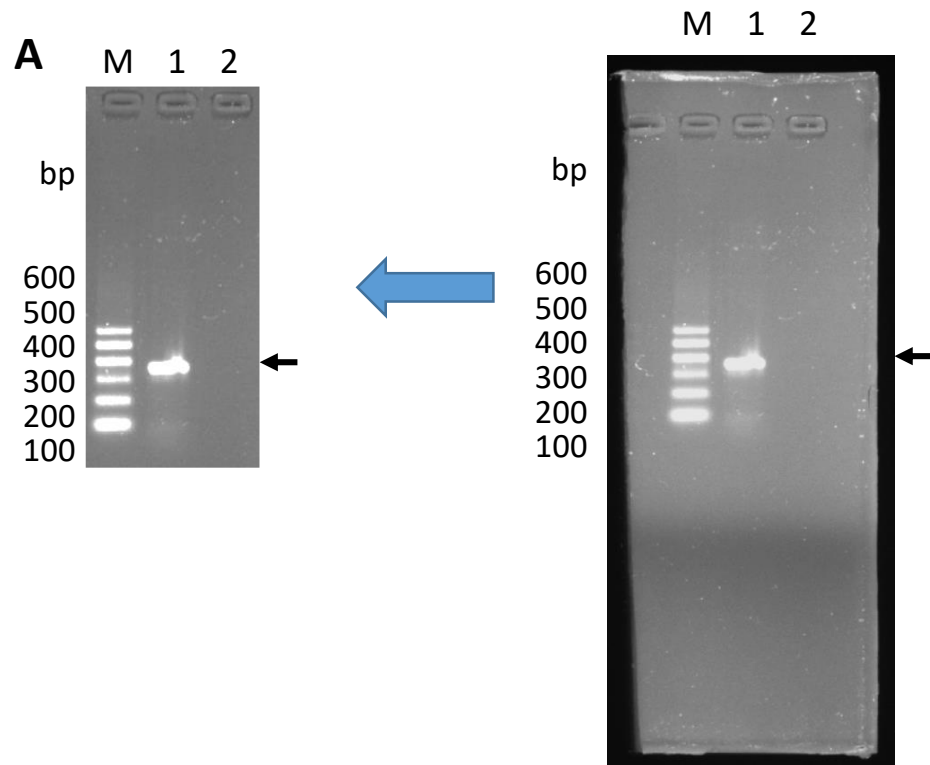

Supplement: 12920_2023_1514_MOESM2_ESM.pdf [file 12920_2023_1514_MOESM2_ESM.pdf]
